# Supplementary material
Source: PubMed Central journal article supplement (PMC2828266)
Supplement: NIHMS168780-supplement-1.pdf [file NIHMS168780-supplement-1.pdf]

**Real-time imaging of hepatitis C virus infection using a fluorescent cell-based reporter system**

Christopher T. Jones, Maria Teresa Catanese, Lok Man J. Law, Salman R. Khetani, Andrew J. Syder, Alexander Ploss, Thomas S. Oh, John W. Schoggins, Margaret R. MacDonald, Sangeeta N. Bhatia, and Charles M. Rice

**Supplementary material**

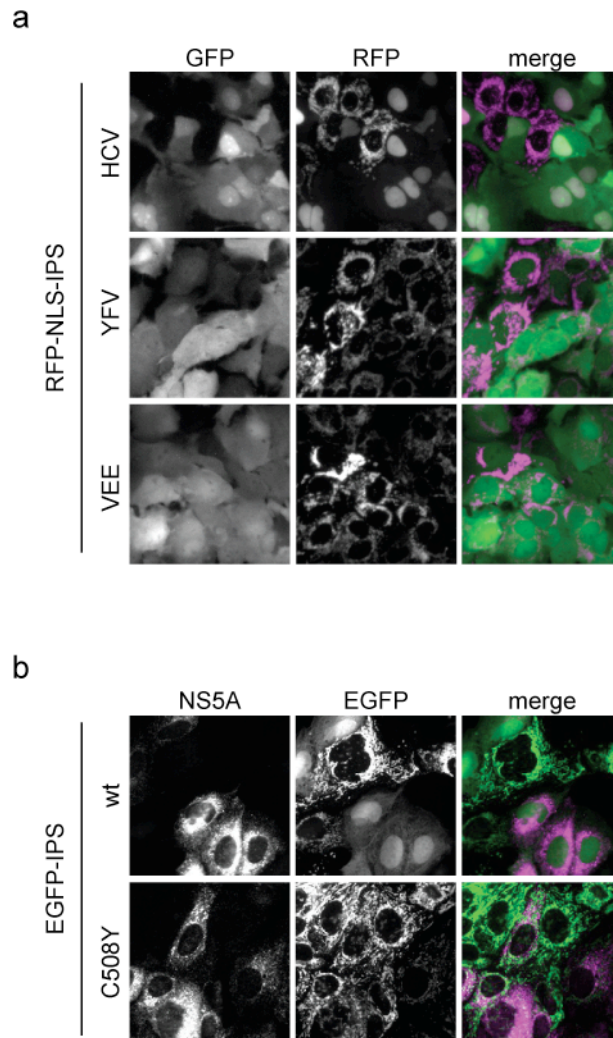

**Supplementary Figure 1.** HCV-specificity of the IPS-1-based reporter system (a) RFP-NLS-IPS relocalization is not a pan-viral phenotype. Huh-7.5 cells harboring RFP-NLS-IPS were infected with RNA viruses expressing green fluorescent proteins: an HCVcc reporter genome expressing Ypet (HCV, 48 h post infection), yellow fever virus expressing Venus (YFV, 24 h post infection), or Venezuelan equine encephalitis encoding EGFP (VEE, 8 h post infection). Grayscale images show virally-encoded green fluorescence (GFP) and RFP-NLS-IPS localization (RFP). Merge images indicate an association between HCV, but not YFV or VEE, infection and nuclear RFP-IPS fluorescence. Wide-field fluorescence images of unfixed cells are shown. (b) EGFP-IPS relocalizes in HCV-infected cells. Huh-7.5 cells expressing wild type (wt) or mutant (C508Y) EGFP-IPS were infected with HCVcc virus, Jc1. Grayscale images show EGFP-IPS fluorescence (EGFP) and immunostaining for an HCV replicase protein (NS5A) in fixed cells at 48 h post-infection. Merged images show correlation of NS5A-positivity and diffuse EGFP in wt, but not C508Y, reporter cells.

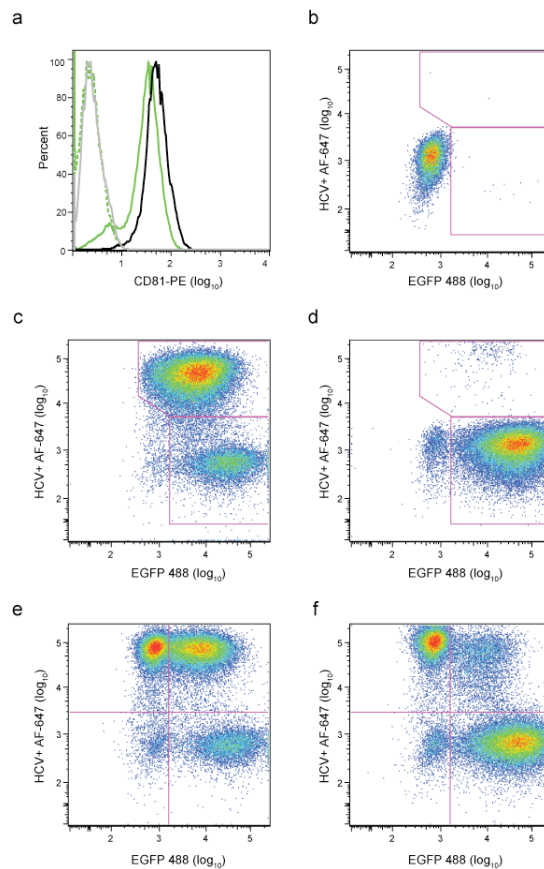

Cultures:  
(% HCV+ cells)

|                            | Mono- | Co-  |
|----------------------------|-------|------|
| RFP-NLS-IPS                | 92.4  | 93   |
| EGFP-IPS/IRR               | 78.5  | 79.2 |
| EGFP-IPS/CD81 <sup>-</sup> | 0.64  | 13.7 |

**Supplementary Figure 2.** FACS analysis of HCVcc-infected reporter cell mono- and co-cultures. (a) CD81 expression in uninfected wild type (wt) and shRNA-expressing Huh-7.5 cell lines, as detected by staining with PE-conjugated anti-CD81 antibody. Huh-7.5 cells, solid black line; EGFP-IPS/IRR cells, solid green line; EGFP-IPS/CD81<sup>-</sup> cells, dashed green line and grey line (unstained). NS5A, detected by staining with 9E10 conjugated to AlexFluor-647, and EGFP signals of uninfected Huh-7.5 cells (b) and J6/JFH clone 2-infected monocultures of EGFP-IPS/IRR (c) or EGFP-IPS/CD81<sup>-</sup> cells (d). NS5A and EGFP levels in co-cultures of J6/JFH clone 2-infected RFP-NLS-IPS cells with EGFP-IPS/IRR (e) or EGFP-IPS/CD81<sup>-</sup> (f) cells. Table shows percent NS5A-positive cells for each cell population in mono- or co-culture.

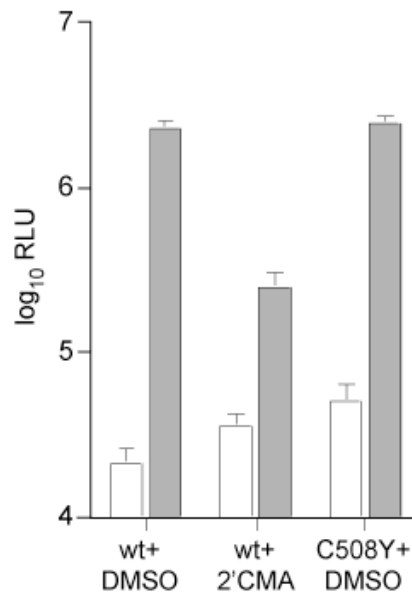

**Supplementary Figure 3.** Infection of primary hepatocyte MPCC. MPCC transduced with lentiviruses expressing wild type (wt) or mutant (C508Y) RFP-NLS-IPS were infected with Jc1FLAG2(p7-nsGluc2A). At 12 h post-infection virus was removed, cells were washed three times, and media was replaced with MPCC media containing DMSO or 2'CMA. Levels of secreted *Gaussia* luciferase activity were measured immediately after media replacement (white bars) and at 48 h post-infection (grey bars). Average values of three independent infections are shown; error bars represent standard error of the mean. Graph generated using Prism 4 software.

**Supplementary Video 1.** Time-lapse live cell imaging of HCVcc infection. Huh-7.5 cells expressing mito-EGFP and RFP-NLS-IPS were infected with Jc1FLAG2(p7-nsGluc2A) in the presence of DMSO or 2'CMA. At 5 h post infection, virus was removed and replaced with imaging media containing either DMSO (a) or 2'CMA (b). Images were captured every 30 min, starting at 6 h post-infection. In a second experiment, cells were infected for 24 h prior replacement of complete media with imaging media containing DMSO (c) or VX-950 (d). Image acquisition was initiated 0.5 h after the addition of imaging media. Images were assembled and processed using ImageJ64 software. For clarity only RFP images (displayed as grayscale) are shown.

**Supplementary Video 2.** Time-lapse live cell imaging of HCV-induced stress response. Huh-7 cells expressing RFP-NLS-IPS and EGFP-G3BP were infected with Jc1FLAG2(p7-nsGluc2A). At 5 h post-infection virus was removed and replaced with imaging media containing DMSO (a and b) or 2'CMA (c). Images were captured every 30 min, starting at 6 h post-infection. Images were assembled and processed using ImageJ64 software. RFP-NLS-IPS (left), EGFP-G3BP (middle), color merge (right).
